# Supplementary material
Source: publisher figshare collection journal article supplement (https://acs.figshare.com/ndownloader/files/13142780)
Supplement: Supplementary file 1 [file 13142780]

Supporting Information

**Benchmarking bicontinuous nanospheres against polymersomes for *in vivo* biodistribution and dual intracellular delivery of lipophilic and water soluble payloads**

Sean D. Allen<sup>1†</sup>, Sharan Bobbala<sup>2†</sup>, Nicholas B. Karabin<sup>2</sup>, Mallika Modak<sup>2</sup>, and Evan A. Scott<sup>1,2,3,4,5\*</sup>

<sup>1</sup>Interdisciplinary Biological Sciences, Northwestern University, Evanston, USA.

<sup>2</sup>Department of Biomedical Engineering, Northwestern University, Evanston, USA.

<sup>3</sup>Chemistry of Life Processes Institute, Northwestern University, Evanston, USA.

<sup>4</sup>Simpson Querrey Institute, Northwestern University, Chicago, USA.

<sup>5</sup>Robert H. Lurie Comprehensive Cancer Center, Northwestern University, Chicago, USA.

<sup>†</sup>These authors contributed equally to this work.

\* Corresponding Author: [evan.scott@northwestern.edu](mailto:evan.scott@northwestern.edu)

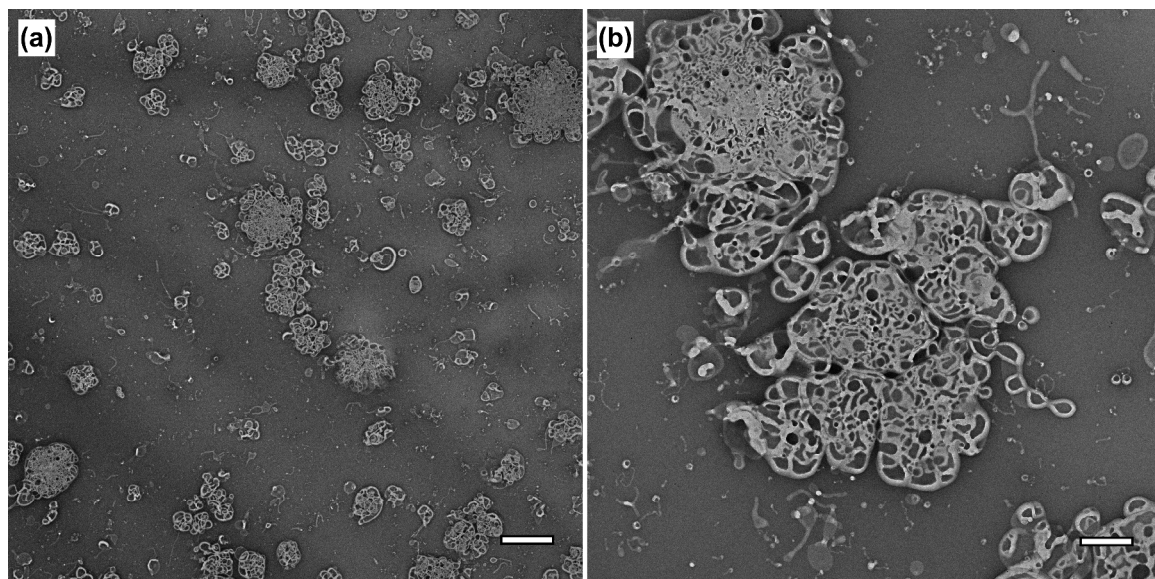

**Supplemental Figure 1. Negative Stained TEM Images of BCNs. (a) Low and (b) high magnification**

TEM images of BCNs. Scale bar for (a) represents 2000 nm, scale bar for (b) represents 500 nm.

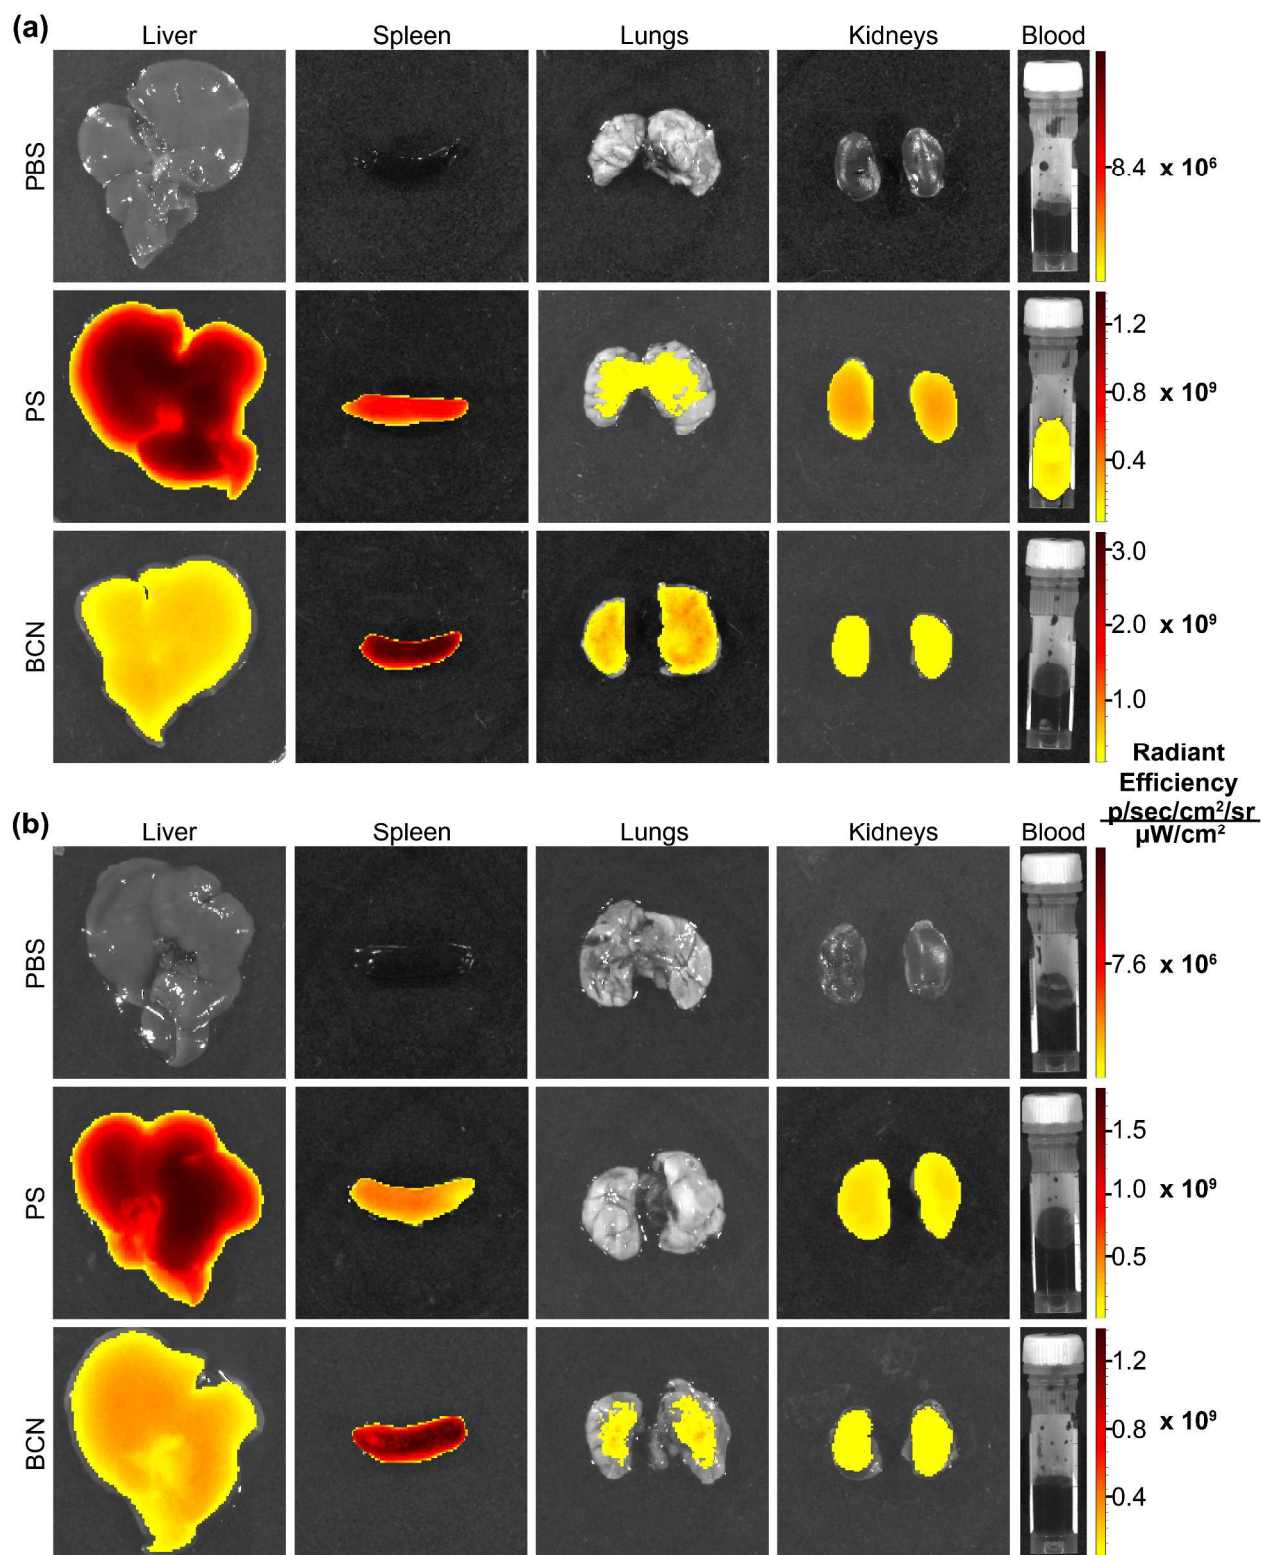

**Supplemental Figure 2. IVIS Organ-Level Biodistribution of PSs and BCNs 4 and 24 H Post IV Injection.** Representative IVIS images for organs harvested from a PBS, PS, or BCN treated mouse, (a) 4 h or (b) 24 h post IV injection. Each representative mouse is set to its own radiant efficiency scaling, displayed on the far right of each row.

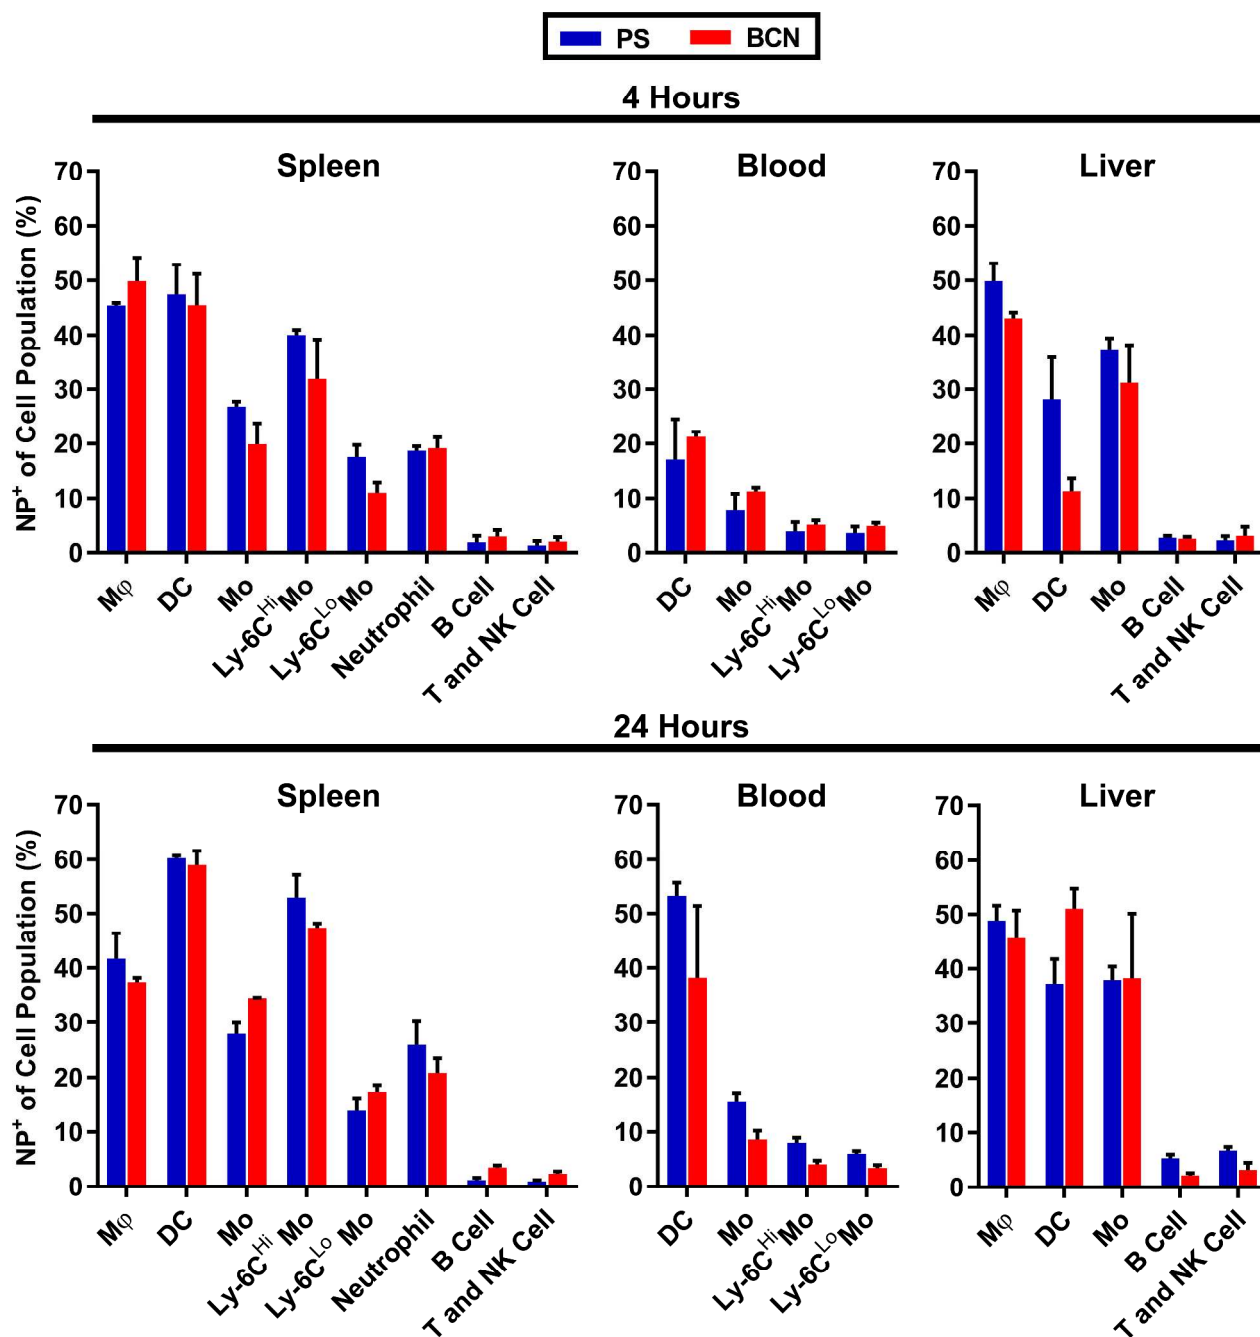

**Supplemental Figure 3. Flow Cytometric Assessment of Cell Population Uptake of PSs and BCNs 4 and 24 h Post IV Injection.** Nanoparticle uptake of PSs and BCNs 4 and 24 h after IV injection in C57BL6J female mice, showing immune cell populations in the spleen, blood, and liver. N = 3, error bars = S.E.M. Mφ = macrophages (CD45<sup>+</sup> CD3<sup>-</sup> CD19<sup>-</sup> NK1.1<sup>-</sup> Ly-6G<sup>-</sup> F4/80<sup>+</sup>), Mo = Monocytes (CD45<sup>+</sup> CD3<sup>-</sup> CD19<sup>-</sup> NK1.1<sup>-</sup> Ly-6G<sup>-</sup> CD11b<sup>+</sup> CD11c<sup>-</sup> Ly-6C<sup>hi/lo</sup>), DCs = dendritic cells (CD45<sup>+</sup> CD3<sup>-</sup> CD19<sup>-</sup> NK1.1<sup>-</sup> Ly-6G<sup>-</sup> F4/80<sup>-</sup> CD11c<sup>+</sup> CD8a<sup>+/+</sup>), neutrophils: CD45<sup>+</sup> CD3<sup>-</sup> CD19<sup>-</sup> NK1.1<sup>-</sup> Ly-6G<sup>+</sup>, B cells: CD45<sup>+</sup> CD19<sup>+</sup>, T and NK Cells: CD45<sup>+</sup> CD19<sup>-</sup> NK1.1<sup>+/+</sup> CD3<sup>+/+</sup>.

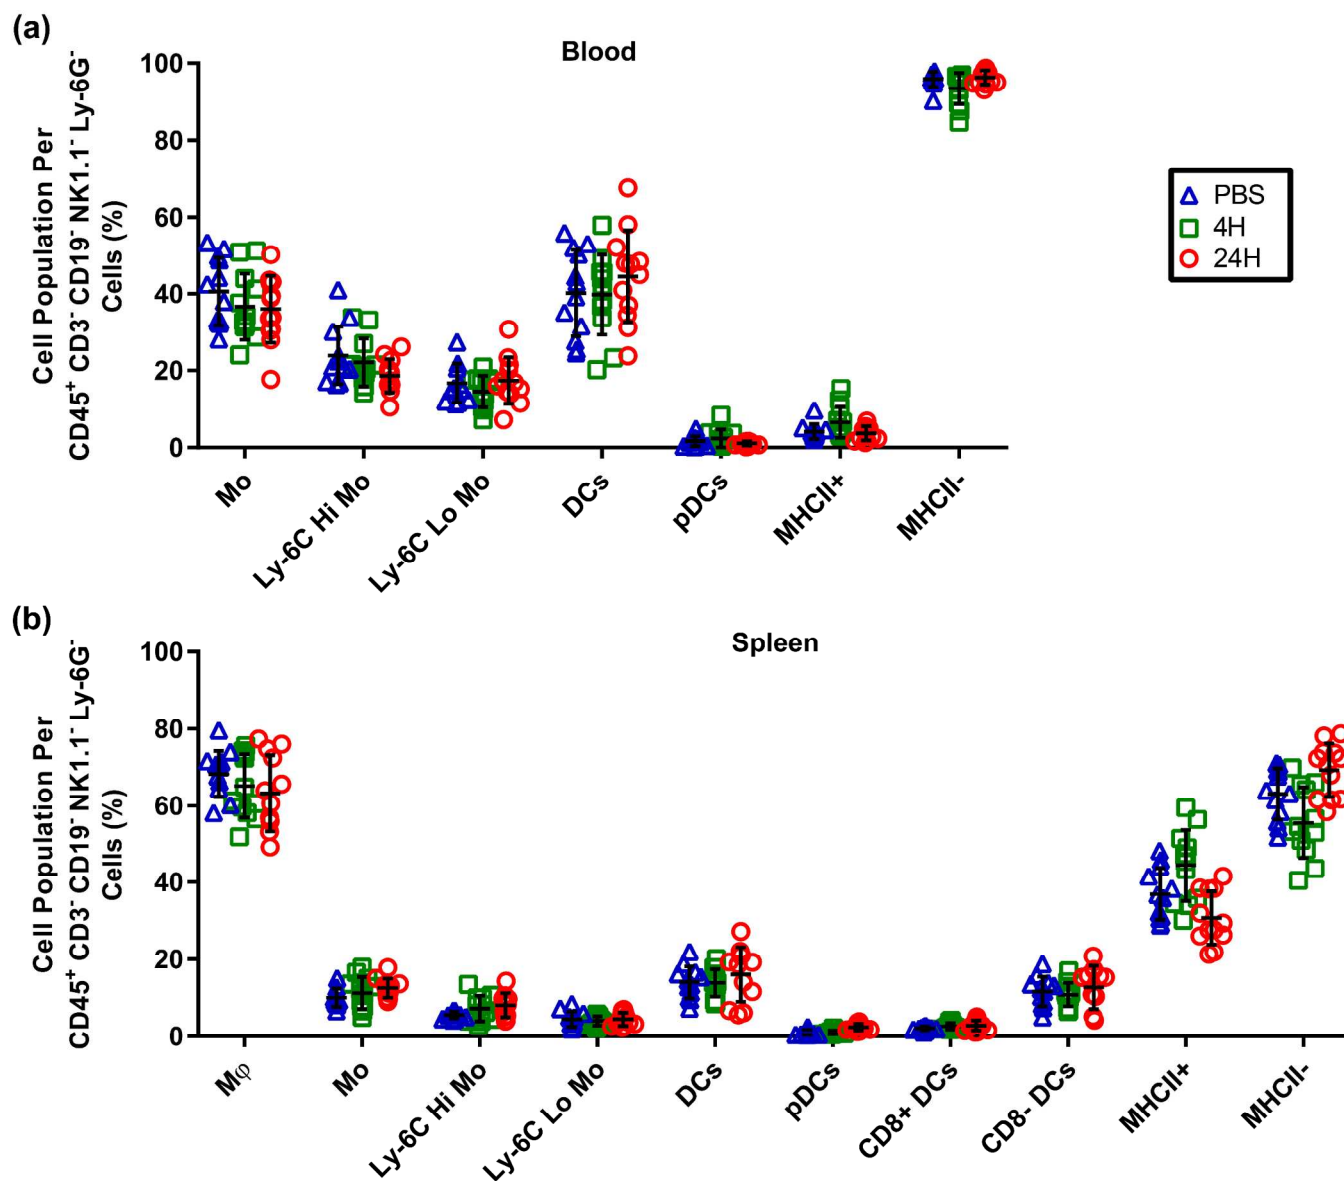

**Supplemental Figure 4. Flow Cytometric Quantification of Cell Populations With and Without Treatment.** Comparison of cell populations in the (a) blood and (b) spleen, relative to all CD45<sup>+</sup> CD3<sup>-</sup> CD19<sup>-</sup> NK1.1<sup>-</sup> Ly-6G<sup>-</sup> cells for PBS-treated mice (both timepoints combined) and nanocarrier-treated mice (PS and BCN combined, timepoints separated). Error bars = S.D.



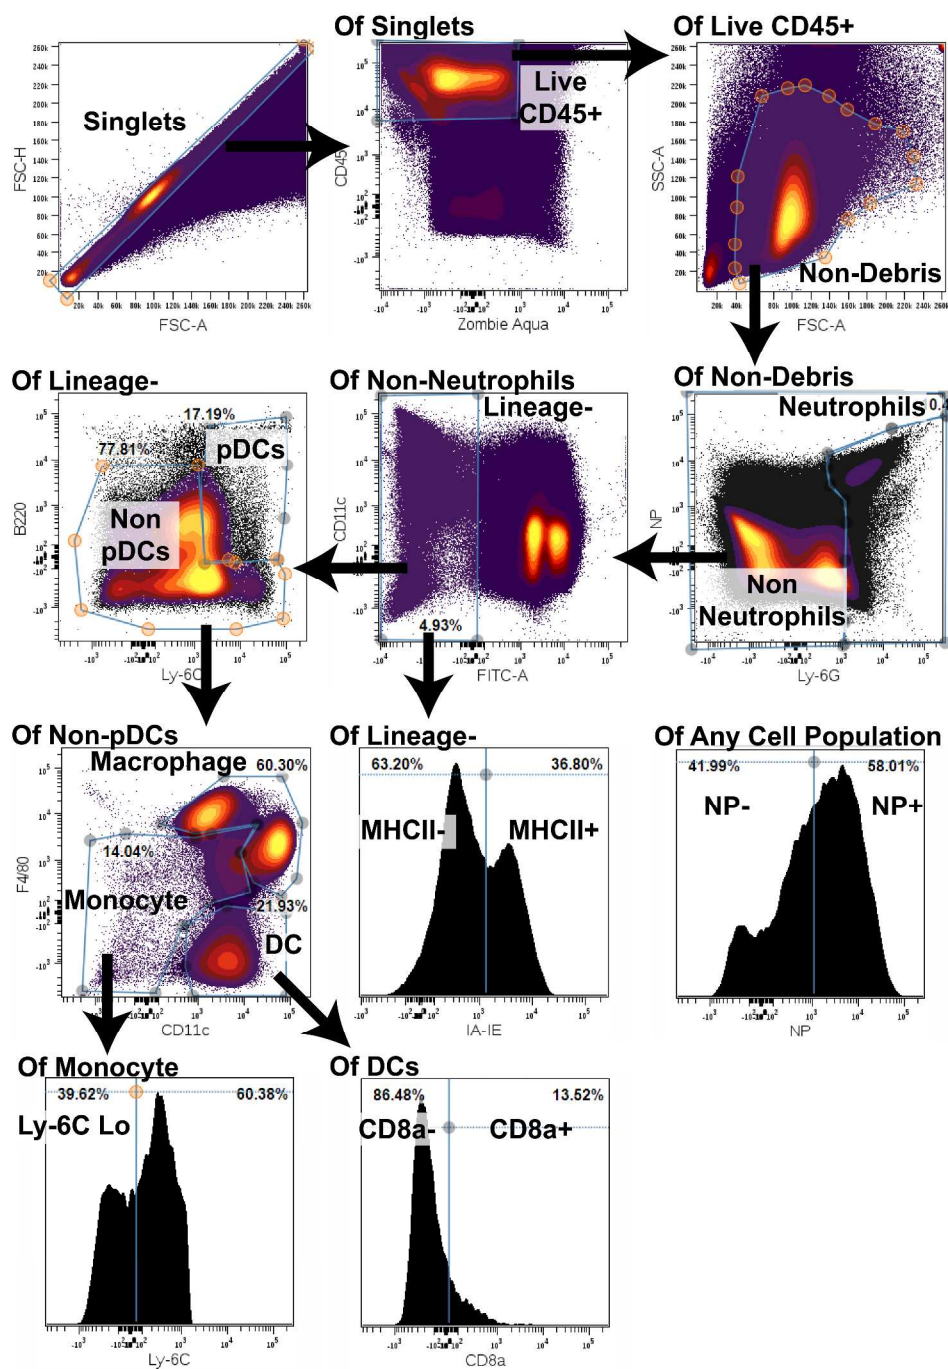

**Supplemental Figure 5. Gating Strategy for Cell Populations in Flow Cytometry Studies.**

Representative contour plots are displayed from an example mouse spleen.
